# Supplementary material
Source: publisher figshare collection journal article supplement (https://springernature.figshare.com/ndownloader/files/20089655)

**A**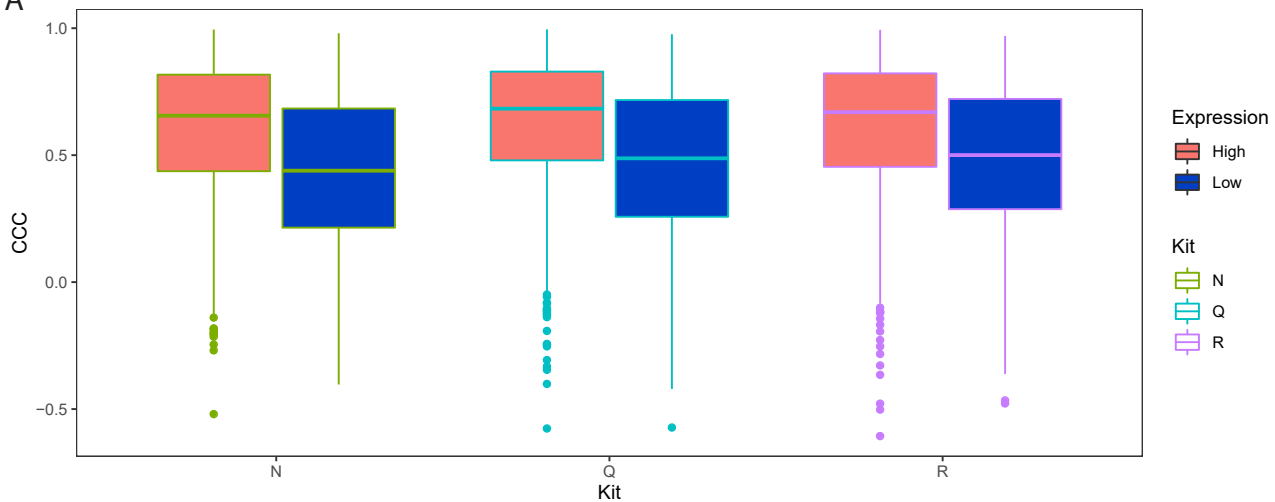**B**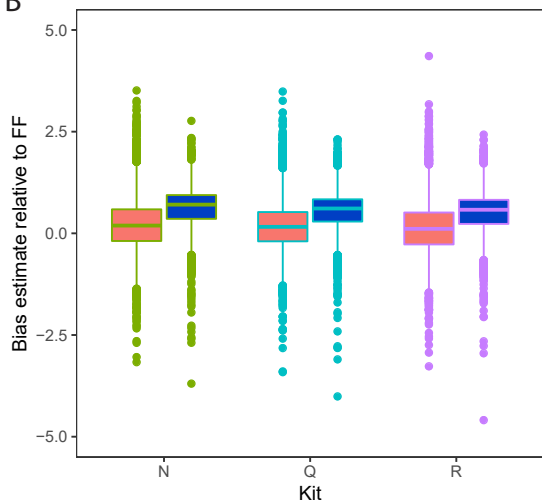**C**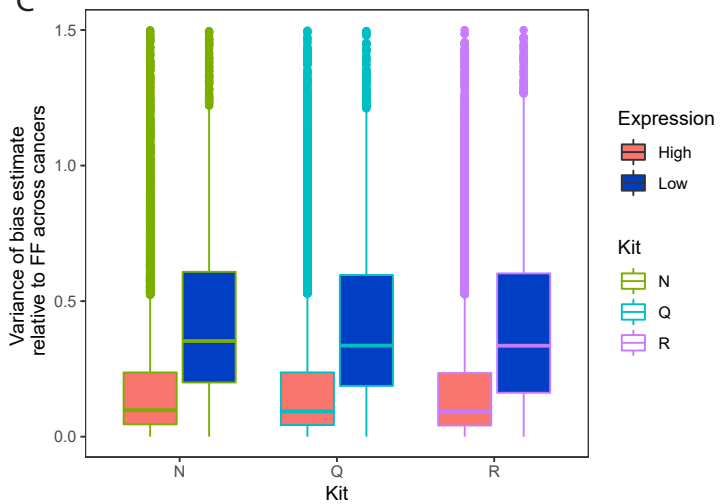

Supplement: Supplementary file [file 20089655]
